# Supplementary material for: Noncausal effects of genetic predicted depression and gastric cancer risk: A NHANES and Mendelian randomization study
Source: Research Square preprint supplement (doi:10.21203/rs.3.rs-4194989/v1), 2024-04-29
Supplement: Supplementary file 1 [file 7050308f56175450d980a6b9.xlsx]

## Sheet: Table 1
Table 1: Basic characteristics of nhanes crowd
	level	Overall
n		27026
Gender	Female	13682 (50.6)
	Male	13344 (49.4)
Age [median IQR]		48.00 [33.00, 62.00]
Race	Mexican American	4304 (15.9)
	Non-Hispanic Black	5986 (22.1)
	Non-Hispanic White	10500 (38.9)
	Other races	6236 (23.1)
Poor income ratio	<1	5407 (22.0)
	1-1.99	6683 (27.2)
	2-3.99	6367 (25.9)
	>4	6099 (24.8)
Educational level	College Graduate or above	6165 (22.8)
	Don't Know	16 ( 0.1)
	High school degree/equivalency or less	6594 (24.4)
	High School Grad/GED or Equivale	6230 (23.1)
	Some College or AA degree	8021 (29.7)
Body mass index	normal	7024 (26.2)
	obese	10709 (40.0)
	overweight	8633 (32.2)
	underweight	406 ( 1.5)
Physical activity	Active	10281 (51.3)
	Inactive	9751 (48.7)
Smoking status	frequent	4563 (38.7)
	never	6127 (52.0)
	sometimes	1096 ( 9.3)
Alcohol status	Don't know	17 ( 0.1)
	No	7277 (27.4)
	Yes	19264 (72.5)
Stomach cancer	No	26999 (99.9)
	Yes	27 ( 0.1)
Depression status	No	24028 (88.9)
	Yes	2998 (11.1)

## Sheet: Table 2
Table2： The relationship between basic characteristics and depression
	level	No	Yes	p
n		24028	2998
Gender	Female	11815 ( 49.2)	1867 ( 62.3)	<0.001
	Male	12213 ( 50.8)	1131 ( 37.7)
Age..median..IQR..		47.00 [33.00, 62.00]	53.00 [35.00, 61.00]	<0.001
Race	Mexican American	3850 ( 16.0)	454 ( 15.1)	0.163
	Non-Hispanic Black	5309 ( 22.1)	677 ( 22.6)
	Non-Hispanic White	9292 ( 38.7)	1208 ( 40.3)
	Other races	5577 ( 23.2)	659 ( 22.0)
Poor income ratio	<1	4382 ( 20.1)	1025 ( 37.9)	<0.001
	>4	5811 ( 26.6)	288 ( 10.7)
	1-1.99	5804 ( 26.6)	879 ( 32.5)
	2-3.99	5857 ( 26.8)	510 ( 18.9)
Educational level	College Graduate or above	5851 ( 24.4)	314 ( 10.5)	<0.001
	Don't Know	12 ( 0.0)	4 ( 0.1)
	High school degree/equivalency or less	5532 ( 23.0)	1062 ( 35.4)
	High School Grad/GED or Equivale	5502 ( 22.9)	728 ( 24.3)
	Some College or AA degree	7131 ( 29.7)	890 ( 29.7)
Body mass index	normal	6393 ( 26.8)	631 ( 21.3)	<0.001
	obese	9194 ( 38.6)	1515 ( 51.2)
	overweight	7881 ( 33.1)	752 ( 25.4)
	underweight	345 ( 1.4)	61 ( 2.1)
Physical activity	Active	9367 ( 51.7)	914 ( 47.9)	0.002
	Inactive	8758 ( 48.3)	993 ( 52.1)
Smoking status	frequent	3629 ( 36.1)	934 ( 53.9)	<0.001
	never	5466 ( 54.4)	661 ( 38.2)
	sometimes	959 ( 9.5)	137 ( 7.9)
Alcohol status	Don't know	15 ( 0.1)	2 ( 0.1)	0.634
	No	6442 ( 27.3)	835 ( 28.1)
	Yes	17133 ( 72.6)	2131 ( 71.8)
Derepssion	No	24008 ( 99.9)	2991 ( 99.8)	0.032
	Yes	7 ( 0.2)	20 ( 0.1)

## Sheet: Sheet1
Table 3：Three model variables based on gastric cancer diagnosis based on depression
Variables	OR	LowCI	UpCI	Pvalue	Model
StoYes	2.80936	1.10132	6.35003	0.0187805	Model1
StoYes	2.84808	1.11034	6.48505	0.0181371	Model2
Age	1.00039	0.99818	1.00261	0.728135	Model2
GenMale	0.585508	0.54141	0.632945	3.84029e-41	Model2
RaceNon-Hispanic Black	1.07299	0.94588	1.21817	0.274906	Model2
RaceNon-Hispanic White	1.10383	0.984667	1.23931	0.0921912	Model2
RaceOther races	0.996091	0.87774	1.13127	0.951743	Model2
StoYes	4.13098	1.31473	12.3092	0.0111559	Model3
Age	0.999692	0.996304	1.00309	0.858808	Model3
GenMale	0.494368	0.444664	0.549476	6.33507e-39	Model3
RaceNon-Hispanic Black	0.963918	0.798199	1.16679	0.704216	Model3
RaceNon-Hispanic White	1.02627	0.866354	1.2204	0.76659	Model3
RaceOther races	1.1617	0.958187	1.41135	0.128992	Model3
Smoking_statusnever	0.474445	0.422253	0.532809	3.07164e-36	Model3
Smoking_statussometimes	0.575095	0.470696	0.698097	3.66951e-08	Model3
Alcohol_statusNo	0.521581	0.114568	3.66895	0.437582	Model3
Alcohol_statusYes	0.459844	0.101422	3.22665	0.353115	Model3
